# Supplementary material for: Genetic and Environmental Contribution to the Co-Occurrence of Endocrine-Metabolic Disorders and Depression: A Nationwide Swedish Study of Siblings
Source: Atypon-hosted journal article supplement (doi:10.1176/appi.ajp.21090954), 2022-09-21
Supplement: appi.ajp.21090954.ds001.pdf [file appi.ajp.21090954.ds001.pdf]

## Supplementary Appendix

Leone M, Kuja-Halkola R, Leval A, Butwicka A, Skov J, Zhang R, Liu S, Larsson H, Bergen SE. Genetic and environmental contribution to the co-occurrence of endocrine-metabolic disorders and depression: a nationwide Swedish study of siblings

### Contents

|                                                                                                                                                                                                                                                |    |
|------------------------------------------------------------------------------------------------------------------------------------------------------------------------------------------------------------------------------------------------|----|
| Methods S1 .....                                                                                                                                                                                                                               | 2  |
| Table S1. Sibling pairs characteristics .....                                                                                                                                                                                                  | 3  |
| Table S2. Diagnostic classification of endocrine-metabolic disorders considered in this study .....                                                                                                                                            | 4  |
| Table S3. Diagnostic classification of depression .....                                                                                                                                                                                        | 5  |
| Table S4. Sex-specific prevalence of endocrine-metabolic disorders among individuals with and without a depression diagnosis .....                                                                                                             | 6  |
| Table S5. Prevalence of endocrine-metabolic disorders in individual with and without depression among sibling cohorts.....                                                                                                                     | 7  |
| Table S6. Prevalence of individuals with and without depression having a full-, maternal half-, or paternal half-sibling diagnosed with an endocrine-metabolic disorder .....                                                                  | 8  |
| Table S7. Prevalence of individuals with and without depression having a full- or maternal half-sibling diagnosed with an endocrine-metabolic disorder (using only one pair of siblings per family).....                                       | 9  |
| Table S8. Association and familial co-aggregation of depression and endocrine-metabolic disorders using logistic regression model.....                                                                                                         | 10 |
| Table S9. Association and familial co-aggregation of depression and endocrine-metabolic disorders using hazard proportional hazards regression model, and modelling depression as the outcome disorder.....                                    | 11 |
| Table S10. Association and familial co-aggregation of depression and endocrine-metabolic disorders using hazard proportional hazards regression model, and modelling depression as the exposure disorder .....                                 | 12 |
| Table S11. Univariate ACE models with 95% confidence intervals calculated using weighted least squares .....                                                                                                                                   | 13 |
| Table S12. A, C, and E correlations with 95% confidence intervals calculated using weighted least squares.....                                                                                                                                 | 14 |
| Table S13. Bivariate heritability explained by A, C, and E with 95% confidence intervals calculated using weighted least squares .....                                                                                                         | 15 |
| Figure S1. Association and familial co-aggregation of depression and endocrine-metabolic disorders, grouped as autoimmune and non-autoimmune conditions: Comparison of logistic regression and Cox proportional hazard regression models ..... | 16 |
| Figure S2. Association and familial co-aggregation of depression and endocrine-metabolic disorders, grouped as autoimmune and non-autoimmune conditions: Comparison of original vs restricted birth cohort.....                                | 17 |
| Figure S3. Association and familial co-aggregation of depression and endocrine-metabolic disorders, grouped as autoimmune and non-autoimmune conditions: Comparison of male and female .....                                                   | 18 |
| Figure S4. Association and familial co-aggregation of depression and endocrine-metabolic disorders, across parental educational levels.....                                                                                                    | 19 |
| References.....                                                                                                                                                                                                                                | 21 |

## **Methods S1.**

We used structural equation modeling (SEM) to estimate the contribution of genetic, shared-, and non-shared environmental factors to the co-occurrence of depression and endocrine-metabolic disorders. SEM is a statistical method combining factor and regression analyses used to describe the relative contribution of the latent (unmeasured) constructs that are assumed to underpin the observed data (1).

SEM can be applied to analyze categorical traits by using liability threshold models. In this model, the associations between binary traits are modelled as tetrachoric correlations, i.e., the observed binary trait is assumed to be underpinned by a normal distribution of liability in the population. Individuals whose disease risks exceeded a given threshold on this liability distribution are cases, and those below are non-cases. The level of the threshold is given by the life-time prevalence of the disorder in the population (2).

A SEM model may be fitted using different optimization techniques, mainly maximum likelihood and weighted least squares (WLS). In this study, similar estimates were obtained when comparing these two approaches, although we encountered convergence issues when estimating 95% CIs using maximum likelihood; on the contrary, WLS was found to be faster (less than 3 minutes per analysis, compared to approximately 17 minutes when using maximum likelihood) and stable during optimization.

In order to avoid possible introduction of biases, we only used ACE models and did not test other submodels (e.g. by excluding C). In fact, given that our results showed a small contribution of C to the co-occurrence of depression and endocrine-metabolic disorders, excluding this parameter would have necessarily increased (biased upwards) the A (3).

**Table S1. Sibling pairs characteristics**

|                                                   | Full cohort (n=2 263 311) | Female (n=1 105 301; 48.8) <sup>a</sup> |
|---------------------------------------------------|---------------------------|-----------------------------------------|
| <b>Full siblings</b>                              |                           |                                         |
| Unique individuals                                | 1 615 237 (71.4)          | 458 087 (41.4)                          |
| Sibling pairs                                     | 1 207 943                 | 286 123                                 |
| Familial co-aggregation pairs <sup>b</sup>        | 2 415 886                 | 572 246                                 |
| Quantitative genetic modelling pairs <sup>c</sup> | 691 499                   | 211 178                                 |
| <b>Maternal half-siblings</b>                     |                           |                                         |
| Unique individuals                                | 240 938 (10.6)            | 69 280 (6.3)                            |
| Sibling pairs                                     | 173 934                   | 42 128                                  |
| Familial co-aggregation pairs <sup>b</sup>        | 347 868                   | 84 256                                  |
| Quantitative genetic modelling pairs <sup>c</sup> | 86 948                    | 29 418                                  |
| <b>Paternal half-siblings</b>                     |                           |                                         |
| Unique individuals                                | 246 886 (10.9)            | 72 705 (6.6)                            |
| Sibling pairs                                     | 186 374                   | 44 913                                  |
| Familial co-aggregation pairs <sup>b</sup>        | 372 748                   | 89 826                                  |
| Quantitative genetic modelling pairs <sup>c</sup> | NA                        | NA                                      |

Abbreviations: NA, not applicable.

Data is presented as number (%) of individuals.

<sup>a</sup> Female-female pairs were used when investigating polycystic ovarian syndrome.

<sup>b</sup> In the familial co-aggregation analyses, all possible combinations of sibling pairs were identified, with each individual contributing at least once as an index person and once as a sibling.

<sup>c</sup> In the quantitative genetic modelling, only full- and maternal half-sibling pairs were included and, within each family, only the oldest pair of siblings was selected to avoid dependency between sibling pairs from the same family and increase the precision of the estimates.

**Table S2. Diagnostic classification of endocrine-metabolic disorders considered in this study**

| Type of disease                          | ICD Version | Diagnostic code    |
|------------------------------------------|-------------|--------------------|
| <b>Autoimmune disorders</b>              |             |                    |
| Autoimmune hypothyroidism <sup>a</sup>   | ICD-8       | 244.09             |
|                                          | ICD-9       | 244W, 244X, 245C   |
|                                          | ICD-10      | E03.4-E03.9, E06.3 |
| Graves' disease                          | ICD-8       | 242.00-242.09      |
|                                          | ICD-9       | 242A               |
|                                          | ICD-10      | E05.0              |
| Type I diabetes <sup>b</sup>             | ICD-8       | 250.00-250.09      |
|                                          | ICD-9       | 250A-X             |
|                                          | ICD-10      | E10                |
| <b>Non-autoimmune disorders</b>          |             |                    |
| Type II diabetes <sup>c</sup>            | ICD-8       | 250.00-250.09      |
|                                          | ICD-9       | 250A-X             |
|                                          | ICD-10      | E11                |
| Polycystic ovarian syndrome <sup>d</sup> | ICD-8       | 256.90             |
|                                          | ICD-9       | 256E               |
|                                          | ICD-10      | E28.2              |
| Obesity                                  | ICD-8       | 277.99             |
|                                          | ICD-9       | 278A               |
|                                          | ICD-10      | E66                |

Abbreviations: ICD-8, International Classification of Diseases, 8<sup>th</sup> revision; ICD-9, Swedish version of the International Classification of Diseases, 9<sup>th</sup> revision; ICD-10, International Classification of Diseases, 10<sup>th</sup> revision.

<sup>a</sup> The definition of autoimmune hyperthyroidism was based upon consultation with Swedish endocrinologists as well as on prior literature.(4)

<sup>b</sup> When using ICD-8 and ICD-9, we restricted T1D measure to individuals with a diagnosis of diabetes between 7 months and 18 years of age because these earlier versions of the ICD do not distinguish between type 1 and type 2 diabetes. This definition of T1D was based on prior evidence showing that: 1) The majority (98-99%) of Swedish children who are 0-18 years of age at diagnosis of diabetes have type 1 diabetes;(5) 2) Onset of diabetes before the age of 6 months tends to be indicative of neonatal diabetes with monogenic etiology.(6)

<sup>c</sup> When using ICD-8 and ICD-9, we restricted T2D measure to individuals with a diagnosis of diabetes after the age of 18 years because these earlier versions of the ICD do not distinguish between type 1 and type 2 diabetes. It is important to note that only 877 (13.5%) individuals were diagnosed with diabetes after age 18 using ICD-8 and ICD-9.

<sup>d</sup> As polycystic ovarian syndrome is a condition affecting women's ovaries, this diagnosis was applicable only to female individuals in our study.

**Table S3. Diagnostic classification of depression**

| <b>Psychiatric Disorders</b> | <b>ICD Version</b> | <b>Diagnostic Code</b> |
|------------------------------|--------------------|------------------------|
| Depression                   | ICD-8              | 300.4                  |
|                              | ICD-9              | 296B, 311              |
|                              | ICD-10             | F32-F33                |

Note: For each individual, the first recorded primary or secondary diagnosis of depression from an inpatient (i.e., hospitalization) or outpatient (i.e., specialist care) contact during the follow-up period was included.

**Table S4. Sex-specific prevalence of endocrine-metabolic disorders among individuals with and without a depression diagnosis**

| Endocrine and metabolic disorder         | Sex    | No Depression<br>2 145 260 (94.8) | Depression<br>118 051 (5.2) |
|------------------------------------------|--------|-----------------------------------|-----------------------------|
| <b>Autoimmune disorders</b>              |        |                                   |                             |
| Any autoimmune disorder                  | Female | 24 925 (66.1)                     | 3688 (78.1)                 |
|                                          | Male   | 12 808 (33.9)                     | 1032 (21.9)                 |
| Autoimmune hypothyroidism                | Female | 15 606 (86.7)                     | 2574 (89.0)                 |
|                                          | Male   | 2387 (13.3)                       | 318 (11.0)                  |
| Graves' diseases                         | Female | 4071 (82.2)                       | 422 (86.3)                  |
|                                          | Male   | 880 (17.8)                        | 67 (13.7)                   |
| Type 1 diabetes                          | Female | 7399 (42.3)                       | 1017 (58.5)                 |
|                                          | Male   | 10 108 (57.7)                     | 720 (41.5)                  |
| <b>Non-autoimmune disorders</b>          |        |                                   |                             |
| Any non-autoimmune disorder              | Female | 41 424 (74.1)                     | 6447 (79.8)                 |
|                                          | Male   | 14 501 (25.9)                     | 1633 (20.2)                 |
| Type 2 diabetes                          | Female | 2465 (45.4)                       | 615 (58.6)                  |
|                                          | Male   | 2966 (54.6)                       | 434 (41.4)                  |
| Obesity                                  | Female | 29 190 (70.7)                     | 4825 (78.8)                 |
|                                          | Male   | 12 115 (29.3)                     | 1301 (21.2)                 |
| Polycystic ovarian syndrome <sup>a</sup> | Female | 12 397 (100) <sup>a</sup>         | 1675 (100) <sup>a</sup>     |

Data is presented as number (%) of individuals.

<sup>a</sup> As polycystic ovarian syndrome is a condition affecting women's ovaries, this diagnosis was applicable only to female individuals in our study.

**Table S5. Prevalence of endocrine-metabolic disorders in individual with and without depression among sibling cohorts**

|                                          | <b>Individuals with at least one full-sibling</b><br>1 615 237 (71.4)       |                                   | <b>Individuals with at least one maternal half-sibling</b><br>240 938 (10.6)       |                                 | <b>Individuals with at least one paternal half-sibling</b><br>246 886 (10.9)       |                                 |
|------------------------------------------|-----------------------------------------------------------------------------|-----------------------------------|------------------------------------------------------------------------------------|---------------------------------|------------------------------------------------------------------------------------|---------------------------------|
|                                          | Depression<br>80 454 (5.0)                                                  | No depression<br>1 534 783 (95.0) | Depression<br>19 462 (8.1)                                                         | No depression<br>221 476 (91.9) | Depression<br>18 224 (7.4)                                                         | No depression<br>228 662 (92.6) |
| <b>Autoimmune disorders</b>              |                                                                             |                                   |                                                                                    |                                 |                                                                                    |                                 |
| Any autoimmune disorder                  | 3 133 (3.9)                                                                 | 26 337 (1.7)                      | 738 (3.8)                                                                          | 3 875 (1.7)                     | 685 (3.8)                                                                          | 3 948 (1.7)                     |
| Autoimmune hypothyroidism                | 1 920 (2.4)                                                                 | 12 488 (0.8)                      | 432 (2.2)                                                                          | 1 857 (0.8)                     | 408 (2.2)                                                                          | 1 916 (0.8)                     |
| Graves' diseases <sup>a</sup>            | 321 (0.4)                                                                   | 3 421 (0.2)                       | 92 (0.5)                                                                           | 552 (0.2)                       | 87 (0.5)                                                                           | 562 (0.2)                       |
| Type 1 diabetes                          | 1 157 (1.4)                                                                 | 12 295 (0.8)                      | 282 (1.4)                                                                          | 1 764 (0.8)                     | 252 (1.4)                                                                          | 1 755 (0.8)                     |
| <b>Non-autoimmune disorders</b>          |                                                                             |                                   |                                                                                    |                                 |                                                                                    |                                 |
| Any non-autoimmune disorder              | 5 153 (6.4)                                                                 | 37 363 (2.4)                      | 1 528 (7.9)                                                                        | 7 969 (3.6)                     | 1 371 (7.5)                                                                        | 7 518 (3.3)                     |
| Type 2 diabetes                          | 617 (0.8)                                                                   | 3 355 (0.2)                       | 202 (1.0)                                                                          | 642 (0.3)                       | 168 (0.9)                                                                          | 613 (0.3)                       |
| Obesity                                  | 3 857 (4.8)                                                                 | 27 066 (1.8)                      | 1 202 (6.2)                                                                        | 6 410 (2.9)                     | 1 067 (5.9)                                                                        | 5 954 (2.6)                     |
|                                          | <b>Females with at least one full-sister</b><br>458 087 (41.4) <sup>b</sup> |                                   | <b>Females with at least one maternal half-sister</b><br>69 280 (6.3) <sup>b</sup> |                                 | <b>Females with at least one paternal half-sister</b><br>72 705 (6.6) <sup>b</sup> |                                 |
|                                          | Depression<br>30 015 (6.6)                                                  | No depression<br>428 072 (93.4)   | Depression<br>7 073 (10.2)                                                         | No depression<br>62 207 (89.8)  | Depression<br>6 896 (9.5)                                                          | No depression<br>65 809 (90.5)  |
| Polycystic ovarian syndrome <sup>b</sup> | 652 (2.2)                                                                   | 5 313 (1.2)                       | 170 (2.4)                                                                          | 780 (1.3)                       | 166 (2.4)                                                                          | 842 (1.3)                       |

Data is presented as number (%) of individuals.

<sup>a</sup> Because the prevalence of Graves' disease was too low in the sibling cohorts, this disorder was not included in the quantitative genetic analyses.

<sup>b</sup> As polycystic ovarian syndrome is a condition affecting women's ovaries, this diagnosis was applicable only to female individuals in our study.

**Table S6. Prevalence of individuals with and without depression having a full-, maternal half-, or paternal half-sibling diagnosed with an endocrine-metabolic disorder**

|                                          | <b>Individuals with at least one full-sibling</b><br>1 615 237 (71.4)       |                                   | <b>Individuals with at least one maternal half-sibling</b><br>240 938 (10.6)       |                                 | <b>Individuals with at least one paternal half-sibling</b><br>246 886 (10.9)       |                                 |
|------------------------------------------|-----------------------------------------------------------------------------|-----------------------------------|------------------------------------------------------------------------------------|---------------------------------|------------------------------------------------------------------------------------|---------------------------------|
|                                          | Depression<br>80 454 (5.0)                                                  | No depression<br>1 534 783 (95.0) | Depression<br>19 462 (8.1)                                                         | No depression<br>221 476 (91.9) | Depression<br>18 224 (7.4)                                                         | No depression<br>228 662 (92.6) |
| <b>Sibling autoimmune disorders</b>      |                                                                             |                                   |                                                                                    |                                 |                                                                                    |                                 |
| Any autoimmune disorder                  | 2 644 (3.3)                                                                 | 39 668 (2.6)                      | 619 (3.2)                                                                          | 5 906 (2.7)                     | 548 (3.0)                                                                          | 6 336 (2.8)                     |
| Autoimmune hypothyroidism                | 1 409 (1.8)                                                                 | 19 610 (1.3)                      | 318 (1.6)                                                                          | 2 939 (1.3)                     | 296 (1.5)                                                                          | 3 249 (1.4)                     |
| Graves' diseases <sup>a</sup>            | 327 (0.4)                                                                   | 5 162 (0.3)                       | 90 (0.5)                                                                           | 885 (0.4)                       | 69 (0.4)                                                                           | 942 (0.4)                       |
| Type 1 diabetes                          | 1 110 (1.4)                                                                 | 18 112 (1.2)                      | 268 (1.4)                                                                          | 2 596 (1.2)                     | 255 (1.4)                                                                          | 2 678 (1.2)                     |
| <b>Sibling non-autoimmune disorders</b>  |                                                                             |                                   |                                                                                    |                                 |                                                                                    |                                 |
| Any non-autoimmune disorder              | 4 274 (5.3)                                                                 | 58 045 (3.8)                      | 1 294 (6.6)                                                                        | 12 387 (5.6)                    | 1 166 (6.4)                                                                        | 12 251 (5.4)                    |
| Type 2 diabetes                          | 445 (0.6)                                                                   | 5 335 (0.3)                       | 112 (0.6)                                                                          | 1 129 (0.5)                     | 112 (0.6)                                                                          | 1 150 (0.5)                     |
| Obesity                                  | 3 229 (4.0)                                                                 | 42 302 (2.8)                      | 1 070 (5.5)                                                                        | 9 969 (4.5)                     | 921 (5.1)                                                                          | 9 766 (4.3)                     |
|                                          | <b>Females with at least one full-sister</b><br>458 087 (41.4) <sup>b</sup> |                                   | <b>Females with at least one maternal half-sister</b><br>69 280 (6.3) <sup>b</sup> |                                 | <b>Females with at least one paternal half-sister</b><br>72 705 (6.6) <sup>b</sup> |                                 |
|                                          | Depression<br>30 015 (6.6)                                                  | No depression<br>428 072 (93.4)   | Depression<br>7 073 (10.2)                                                         | No depression<br>62 207 (89.8)  | Depression<br>6 896 (9.5)                                                          | No depression<br>65 809 (90.5)  |
| Polycystic ovarian syndrome <sup>b</sup> | 617 (2.1)                                                                   | 6 859 (1.6)                       | 126 (1.8)                                                                          | 1 043 (1.7)                     | 140 (2.0)                                                                          | 1 096 (1.7)                     |

Data is presented as number (%) of individuals.

<sup>a</sup> Because the prevalence of Graves' disease was too low in the sibling cohorts, this disorder was not included in the quantitative genetic analyses.

<sup>b</sup> As polycystic ovarian syndrome is a condition affecting women's ovaries, this diagnosis was applicable only to female individuals in our study.



**Table S7. Prevalence of individuals with and without depression having a full- or maternal half-sibling diagnosed with an endocrine-metabolic disorder (using only one pair of siblings per family)**

|                                          | <b>Individuals with a full-sibling</b><br>1 382 998                  |                                   | <b>Individuals with a maternal half-sibling</b><br>173 869                   |                                 |
|------------------------------------------|----------------------------------------------------------------------|-----------------------------------|------------------------------------------------------------------------------|---------------------------------|
|                                          | Depression<br>68 868 (5.0)                                           | No depression<br>1 314 130 (95.0) | Depression<br>14 356 (8.2)                                                   | No depression<br>159 540 (91.8) |
| <b>Sibling autoimmune disorders</b>      |                                                                      |                                   |                                                                              |                                 |
| Any autoimmune disorder                  | 1 569 (2.3)                                                          | 24 194 (1.8)                      | 321 (2.2)                                                                    | 3 085 (1.9)                     |
| Autoimmune hypothyroidism                | 843 (1.2)                                                            | 11 894 (0.9)                      | 165 (1.1)                                                                    | 1 525 (1.0)                     |
| Graves' diseases <sup>a</sup>            | NA                                                                   | NA                                | NA                                                                           | NA                              |
| Type 1 diabetes                          | 636 (0.9)                                                            | 10 896 (0.8)                      | 141 (1.0)                                                                    | 1 353 (0.8)                     |
| <b>Sibling non-autoimmune disorders</b>  |                                                                      |                                   |                                                                              |                                 |
| Any non-autoimmune disorder              | 2 525 (3.7)                                                          | 34 200 (2.6)                      | 678 (4.7)                                                                    | 6 373 (4.0)                     |
| Type 2 diabetes                          | 274 (0.4)                                                            | 3 345 (0.3)                       | 62 (0.4)                                                                     | 615 (0.4)                       |
| Obesity                                  | 1 892 (2.7)                                                          | 24 599 (1.9)                      | 550 (3.8)                                                                    | 5 063 (3.2)                     |
|                                          | <b>Females with at least one full-sister</b><br>422 356 <sup>b</sup> |                                   | <b>Females with at least one maternal half-sister</b><br>58 836 <sup>b</sup> |                                 |
|                                          | Depression<br>27 669 (6.6)                                           | No depression<br>394 687 (93.4)   | Depression<br>6 110 (10.4)                                                   | No depression<br>52 726 (89.6)  |
| Polycystic ovarian syndrome <sup>b</sup> | 459 (1.7)                                                            | 5 106 (1.3)                       | 92 (1.5)                                                                     | 722 (1.4)                       |

Data is presented as number (%) of individuals.

<sup>a</sup> Because the prevalence of Graves' disease was too low in the sibling cohorts, this disorder was not included in the quantitative genetic analyses.

<sup>b</sup> As polycystic ovarian syndrome is a condition affecting women's ovaries, this diagnosis was applicable only to female individuals in our study.

**Table S8. Association and familial co-aggregation of depression and endocrine-metabolic disorders using logistic regression model**

| Endocrine-metabolic disorder             | Within-individuals |                |                         | Full-siblings    |                |                         | Maternal half-siblings |                |                         | Paternal half-siblings |                |                         |
|------------------------------------------|--------------------|----------------|-------------------------|------------------|----------------|-------------------------|------------------------|----------------|-------------------------|------------------------|----------------|-------------------------|
|                                          | OR (95% CI)        | <i>P</i> Value | Bonferroni <sup>a</sup> | OR (95% CI)      | <i>P</i> Value | Bonferroni <sup>a</sup> | OR (95% CI)            | <i>P</i> Value | Bonferroni <sup>a</sup> | OR (95% CI)            | <i>P</i> Value | Bonferroni <sup>a</sup> |
| <b>Autoimmune disorders</b>              |                    |                |                         |                  |                |                         |                        |                |                         |                        |                |                         |
| Any disorder                             | 2.05 (1.99-2.12)   | <0.001         | Significant             | 1.24 (1.19-1.29) | <0.001         | Significant             | 1.17 (1.07-1.27)       | <0.001         | Significant             | 1.06 (0.97-1.16)       | 0.22           | Not significant         |
| Autoimmune hypothyroidism                | 2.34 (2.25-2.44)   | <0.001         | Significant             | 1.31 (1.24-1.39) | <0.001         | Significant             | 1.22 (1.08-1.38)       | 0.001          | Significant             | 1.03 (0.91-1.18)       | 0.62           | Not significant         |
| Graves' disease                          | 1.43 (1.30-1.57)   | <0.001         | Significant             | 1.15 (1.02-1.29) | 0.02           | Not significant         | 1.17 (0.93-1.46)       | 0.18           | Not significant         | 0.92 (0.70-1.20)       | 0.53           | Not significant         |
| Type 1 diabetes                          | 1.88 (1.79-1.98)   | <0.001         | Significant             | 1.16 (1.08-1.24) | <0.001         | Significant             | 1.11 (0.97-1.27)       | 0.11           | Not significant         | 1.12 (0.98-1.28)       | 0.11           | Not significant         |
| <b>Non autoimmune-disorders</b>          |                    |                |                         |                  |                |                         |                        |                |                         |                        |                |                         |
| Any disorder                             | 2.33 (2.28-2.39)   | <0.001         | Significant             | 1.39 (1.34-1.44) | <0.001         | Significant             | 1.18 (1.11-1.25)       | <0.001         | Significant             | 1.18 (1.11-1.26)       | <0.001         | Significant             |
| Type 2 diabetes                          | 3.48 (3.25-3.72)   | <0.001         | Significant             | 1.53 (1.37-1.69) | <0.001         | Significant             | 1.08 (0.88-1.33)       | 0.44           | Not significant         | 1.21 (0.99-1.47)       | 0.06           | Not significant         |
| Obesity                                  | 2.44 (2.37-2.50)   | <0.001         | Significant             | 1.44 (1.39-1.50) | <0.001         | Significant             | 1.20 (1.13-1.29)       | <0.001         | Significant             | 1.17 (1.09-1.25)       | <0.001         | Significant             |
| Polycystic ovarian syndrome <sup>b</sup> | 1.79 (1.70-1.88)   | <0.001         | Significant             | 1.25 (1.14-1.36) | <0.001         | Significant             | 1.06 (0.88-1.29)       | 0.54           | Not significant         | 1.22 (1.02-1.46)       | 0.03           | Not significant         |

Abbreviations: OR, Odds Ratios.

<sup>a</sup> Bonferroni-corrected significance level of  $P < 0.005$ , accounting for the 11 main analyses.

<sup>b</sup> As polycystic ovarian syndrome is a condition affecting women's ovaries, only female individuals were included in the analyses when exploring this disorder.

**Table S9. Association and familial co-aggregation of depression and endocrine-metabolic disorders using hazard proportional hazards regression model, and modelling depression as the outcome disorder**

| Endocrine-metabolic disorder             | Within-individuals |                |                         | Full-siblings    |                |                         | Maternal half-siblings |                |                         | Paternal half-siblings |                |                         |
|------------------------------------------|--------------------|----------------|-------------------------|------------------|----------------|-------------------------|------------------------|----------------|-------------------------|------------------------|----------------|-------------------------|
|                                          | HR (95% CI)        | <i>P</i> Value | Bonferroni <sup>a</sup> | HR (95% CI)      | <i>P</i> Value | Bonferroni <sup>a</sup> | HR (95% CI)            | <i>P</i> Value | Bonferroni <sup>a</sup> | HR (95% CI)            | <i>P</i> Value | Bonferroni <sup>a</sup> |
| <b>Autoimmune disorders</b>              |                    |                |                         |                  |                |                         |                        |                |                         |                        |                |                         |
| Any disorder                             | 1.79 (1.72-1.86)   | <0.001         | Significant             | 1.20 (1.14-1.26) | <0.001         | Significant             | 1.18 (1.07-1.31)       | 0.001          | Significant             | 1.07 (0.96-1.20)       | 0.21           | Not significant         |
| Autoimmune hypothyroidism                | 1.85 (1.75-1.97)   | <0.001         | Significant             | 1.30 (1.20-1.41) | <0.001         | Significant             | 1.31 (1.12-1.53)       | <0.001         | Significant             | 1.06 (0.89-1.26)       | 0.53           | Not significant         |
| Graves' disease                          | 1.43 (1.27-1.61)   | <0.001         | Significant             | 1.22 (1.05-1.42) | 0.01           | Not significant         | 1.15 (0.88-1.51)       | 0.32           | Not significant         | 0.83 (0.60-1.15)       | 0.26           | Not significant         |
| Type 1 diabetes                          | 1.85 (1.76-1.95)   | <0.001         | Significant             | 1.13 (1.05-1.21) | 0.001          | Significant             | 1.11 (0.96-1.28)       | 0.17           | Not significant         | 1.11 (0.96-1.28)       | 0.16           | Not significant         |
| <b>Non autoimmune-disorders</b>          |                    |                |                         |                  |                |                         |                        |                |                         |                        |                |                         |
| Any disorder                             | 2.10 (2.04-2.18)   | <0.001         | Significant             | 1.39 (1.33-1.45) | <0.001         | Significant             | 1.17 (1.08-1.27)       | <0.001         | Significant             | 1.15 (1.06-1.25)       | 0.001          | Significant             |
| Type 2 diabetes                          | 2.88 (2.63-3.16)   | <0.001         | Significant             | 1.42 (1.23-1.64) | <0.001         | Significant             | 1.01 (0.76-1.34)       | 0.95           | Not significant         | 1.06 (0.81-1.40)       | 0.67           | Not significant         |
| Obesity                                  | 2.20 (2.11-2.28)   | <0.001         | Significant             | 1.43 (1.35-1.50) | <0.001         | Significant             | 1.22 (1.12-1.33)       | <0.001         | Significant             | 1.15 (1.04-1.26)       | 0.01           | Not significant         |
| Polycystic ovarian syndrome <sup>b</sup> | 1.69 (1.57-1.82)   | <0.001         | Significant             | 1.34 (1.19-1.52) | <0.001         | Significant             | 1.00 (0.77-1.31)       | 0.98           | Not significant         | 1.17 (0.91-1.50)       | 0.22           | Not significant         |

Abbreviations: HR, Hazard Ratios.

<sup>a</sup> Bonferroni-corrected significance level of  $P < 0.005$ , accounting for the 11 main analyses.

<sup>b</sup> As polycystic ovarian syndrome is a condition affecting women's ovaries, only female individuals were included in the analyses when exploring this disorder.

**Table S10. Association and familial co-aggregation of depression and endocrine-metabolic disorders using hazard proportional hazards regression model, and modelling depression as the exposure disorder**

| Endocrine-metabolic disorder             | Within-individuals |                |                         | Full-siblings    |                |                         | Maternal half-siblings |                |                         | Paternal half-siblings |                |                         |
|------------------------------------------|--------------------|----------------|-------------------------|------------------|----------------|-------------------------|------------------------|----------------|-------------------------|------------------------|----------------|-------------------------|
|                                          | HR (95% CI)        | <i>P</i> Value | Bonferroni <sup>a</sup> | HR (95% CI)      | <i>P</i> Value | Bonferroni <sup>a</sup> | HR (95% CI)            | <i>P</i> Value | Bonferroni <sup>a</sup> | HR (95% CI)            | <i>P</i> Value | Bonferroni <sup>a</sup> |
| <b>Autoimmune disorders</b>              |                    |                |                         |                  |                |                         |                        |                |                         |                        |                |                         |
| Any disorder                             | 2.13 (2.03-2.23)   | <0.001         | Significant             | 1.30 (1.22-1.39) | <0.001         | Significant             | 1.12 (0.97-1.30)       | 0.12           | Not significant         | 1.05 (0.91-1.21)       | 0.52           | Not significant         |
| Autoimmune hypothyroidism                | 2.18 (2.07-2.29)   | <0.001         | Significant             | 1.28 (1.19-1.39) | <0.001         | Significant             | 1.09 (0.92-1.30)       | 0.31           | Not significant         | 0.99 (0.83-1.18)       | 0.91           | Not significant         |
| Graves' disease                          | 1.19 (1.04-1.37)   | 0.01           | Not significant         | 1.02 (0.85-1.21) | 0.86           | Not significant         | 1.10 (0.77-1.57)       | 0.61           | Not significant         | 1.00 (0.66-1.51)       | 1.00           | Not significant         |
| Type 1 diabetes                          | 1.47 (1.29-1.67)   | <0.001         | Significant             | 1.27 (1.10-1.45) | 0.001          | Significant             | 1.13 (0.85-1.50)       | 0.41           | Not significant         | 1.12 (0.86-1.46)       | 0.39           | Not significant         |
| <b>Non autoimmune-disorders</b>          |                    |                |                         |                  |                |                         |                        |                |                         |                        |                |                         |
| Any disorder                             | 2.13 (2.07-2.20)   | <0.001         | Significant             | 1.33 (1.27-1.39) | <0.001         | Significant             | 1.14 (1.05-1.23)       | 0.002          | Significant             | 1.16 (1.07-1.27)       | <0.001         | Significant             |
| Type 2 diabetes                          | 3.45 (3.16-3.78)   | <0.001         | Significant             | 1.60 (1.39-1.84) | <0.001         | Significant             | 1.20 (0.91-1.58)       | 0.20           | Not significant         | 1.36 (1.05-1.77)       | 0.02           | Not significant         |
| Obesity                                  | 2.28 (2.20-2.37)   | <0.001         | Significant             | 1.39 (1.32-1.47) | <0.001         | Significant             | 1.14 (1.04-1.25)       | 0.004          | Significant             | 1.15 (1.05-1.26)       | 0.004          | Significant             |
| Polycystic ovarian syndrome <sup>b</sup> | 1.56 (1.46-1.67)   | <0.001         | Significant             | 1.14 (1.02-1.27) | 0.03           | Not significant         | 1.07 (0.83-1.38)       | 0.61           | Not significant         | 1.21 (0.95-1.54)       | 0.12           | Not significant         |

Abbreviations: HR, Hazard Ratios.

<sup>a</sup> Bonferroni-corrected significance level of  $P < 0.005$ , accounting for the 11 main analyses.

<sup>b</sup> As polycystic ovarian syndrome is a condition affecting women's ovaries, only female individuals were included in the analyses when exploring this disorder.

**Table S11. Univariate ACE models with 95% confidence intervals calculated using weighted least squares**

| <b>Disorder</b>                          | <b>A</b>          | <b>C</b>          | <b>E</b>          |
|------------------------------------------|-------------------|-------------------|-------------------|
| Depression                               | 0.39 (0.30-0.48)  | 0.03 (-0.01-0.07) | 0.58 (0.53-0.63)  |
| <b>Autoimmune disorders</b>              |                   |                   |                   |
| Any disorder                             | 0.54 (0.33-0.74)  | 0.01 (-0.09-0.11) | 0.45 (0.35-0.56)  |
| Autoimmune hypothyroidism                | 0.57 (0.24-0.90)  | 0.02 (-0.14-0.18) | 0.41 (0.24-0.58)  |
| Graves' disease <sup>a</sup>             | NA                | NA                | NA                |
| Type 1 diabetes                          | 0.70 (0.40-1.00)  | 0.02 (-0.12-0.17) | 0.28 (0.12-0.43)  |
| <b>Non-autoimmune disorders</b>          |                   |                   |                   |
| Any disorder                             | 0.60 (0.46-0.73)  | 0.01 (-0.06-0.07) | 0.40 (0.32-0.47)  |
| Type 2 diabetes                          | 0.70 (-0.07-1.46) | 0.01 (-0.37-0.38) | 0.30 (-0.10-0.69) |
| Obesity                                  | 0.68 (0.53-0.82)  | 0.02 (-0.05-0.09) | 0.31 (0.23-0.39)  |
| Polycystic ovarian syndrome <sup>b</sup> | 0.28 (-0.09-0.66) | 0.17 (-0.01-0.35) | 0.55 (0.35-0.75)  |

Abbreviations: A, additive genetic factors; C, shared environmental factors; E, non-shared environmental factors; NA, not applicable.

<sup>a</sup> Because the prevalence of Graves' disease was too low in the sibling cohorts, this disorder was not included in the quantitative genetic analyses.

<sup>b</sup> As polycystic ovarian syndrome is a condition affecting women's ovaries, only female individuals were included in the analyses when exploring this disorder.

**Table S12. A, C, and E correlations with 95% confidence intervals calculated using weighted least squares**

| Disorder                                 | $r_{ph}$         | $r_A$              | $r_C$                | $r_E$             |
|------------------------------------------|------------------|--------------------|----------------------|-------------------|
| <b>Autoimmune disorders</b>              |                  |                    |                      |                   |
| Any disorder                             | 0.15 (0.14-0.16) | 0.09 (-0.14-0.32)  | 1.00 (-4.44-6.44)    | 0.17 (0.06-0.29)  |
| Autoimmune hypothyroidism                | 0.17 (0.16-0.18) | 0.13 (-0.17-0.42)  | 1.00 (-4.15-6.15)    | 0.19 (0.03-0.35)  |
| Graves' disease <sup>a</sup>             | NA               | NA                 | NA                   | NA                |
| Type 1 diabetes                          | 0.11 (0.10-0.13) | -0.01 (-0.28-0.26) | 1.00 (-3.23-5.23)    | 0.24 (0.03-0.44)  |
| <b>Non-autoimmune disorders</b>          |                  |                    |                      |                   |
| Any disorder                             | 0.19 (0.18-0.20) | 0.23 (0.05-0.40)   | 1.00 (-3.25-5.25)    | 0.13 (0.04-0.23)  |
| Type 2 diabetes                          | 0.22 (0.20-0.23) | 0.31 (-0.09-0.71)  | -1.00 (-29.93-27.93) | 0.17 (-0.10-0.45) |
| Obesity                                  | 0.19 (0.18-0.20) | 0.21 (0.03-0.39)   | 1.00 (-1.66-3.66)    | 0.14 (0.02-0.26)  |
| Polycystic ovarian syndrome <sup>b</sup> | 0.11 (0.09-0.13) | 0.34 (-0.32-0.99)  | -0.02 (-0.79-0.74)   | 0.02 (-0.17-0.21) |

Abbreviations:  $r_{ph}$ , phenotypic correlation (tetrachoric correlation);  $r_A$ , genetic correlation;  $r_C$ , shared environmental correlation;  $r_E$ , non-shared environmental correlation; NA, not applicable.

<sup>a</sup> Because the prevalence of Graves' disease was too low in the sibling cohorts, this disorder was not included in the quantitative genetic analyses.

<sup>b</sup> As polycystic ovarian syndrome is a condition affecting women's ovaries, only female individuals were included in the analyses when exploring this disorder.

**Table S13. Bivariate heritability explained by A, C, and E with 95% confidence intervals calculated using weighted least squares**

| Disorder                                 | Bivariate heritability <sup>a</sup> |                    |                   |
|------------------------------------------|-------------------------------------|--------------------|-------------------|
|                                          | A                                   | C                  | E                 |
| <b>Autoimmune disorders</b>              |                                     |                    |                   |
| Any disorder                             | 0.28 (-0.44-1.01)                   | 0.12 (-0.22-0.46)  | 0.60 (0.20-0.99)  |
| Autoimmune hypothyroidism                | 0.34 (-0.47-1.15)                   | 0.13 (-0.25-0.51)  | 0.53 (0.09-0.97)  |
| Graves' disease <sup>b</sup>             | NA                                  | NA                 | NA                |
| Type 1 diabetes                          | -0.06 (-1.31-1.20)                  | 0.22 (-0.37-0.81)  | 0.84 (0.15-1.52)  |
| <b>Non-autoimmune disorders</b>          |                                     |                    |                   |
| Any disorder                             | 0.58 (0.13-1.03)                    | 0.08 (-0.12-0.29)  | 0.34 (0.09-0.58)  |
| Type 2 diabetes                          | 0.74 (-0.19-1.66)                   | -0.07 (-0.50-0.37) | 0.33 (-0.18-0.84) |
| Obesity                                  | 0.56 (0.08-1.04)                    | 0.12 (-0.10-0.34)  | 0.32 (0.05-0.59)  |
| Polycystic ovarian syndrome <sup>c</sup> | 0.93 (-0.85-2.71)                   | -0.03 (-0.86-0.81) | 0.10 (-0.88-1.07) |

Abbreviations: A, additive genetic factors; C, shared environmental factors; E, non-shared environmental factors; NA, not applicable.

<sup>a</sup> Bivariate heritability is the fraction of the phenotypic correlation (tetrachoric correlation) explained by genetic and environmental factors.

<sup>b</sup> Because the prevalence of Graves' disease was too low in the sibling cohorts, this disorder was not included in the quantitative genetic analyses.

<sup>c</sup> As polycystic ovarian syndrome is a condition affecting women's ovaries, only female individuals were included in the analyses when exploring this disorder.

**Figure S1. Association and familial co-aggregation of depression and endocrine-metabolic disorders, grouped as autoimmune and non-autoimmune conditions: Comparison of logistic regression and Cox proportional hazard regression models**

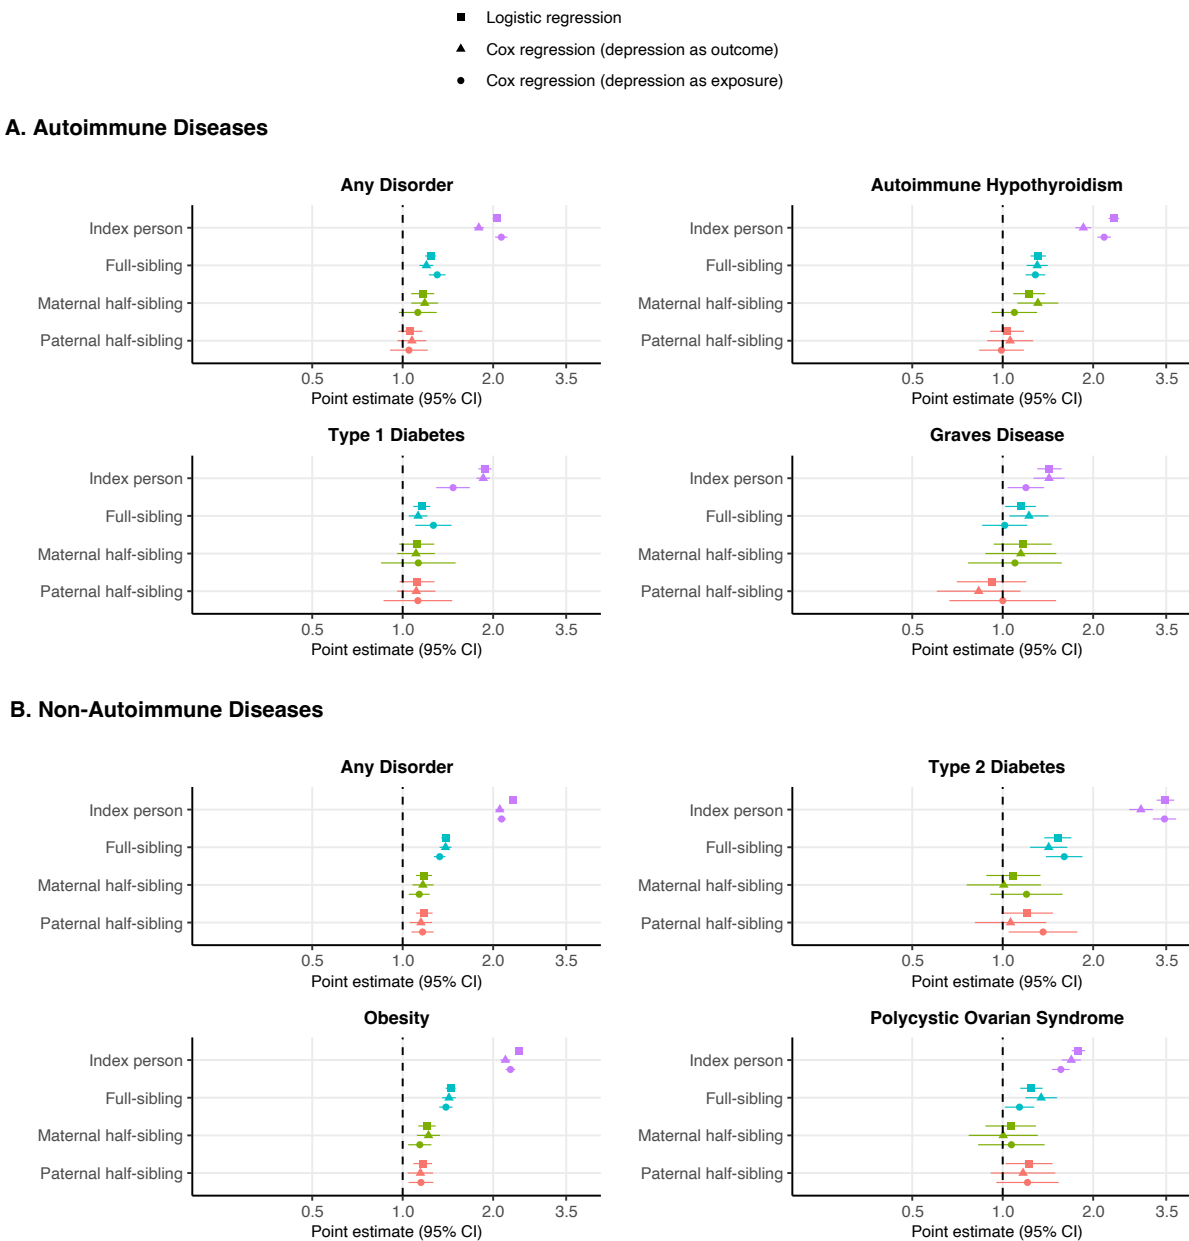

Note: As polycystic ovarian syndrome is a condition affecting women's ovaries, only female individuals were included in the analyses when exploring this disorder.



**Figure S2. Association and familial co-aggregation of depression and endocrine-metabolic disorders, grouped as autoimmune and non-autoimmune conditions: Comparison of original vs restricted birth cohort**

- ▲ Birth cohort: 1973-1996
- Birth cohort: 1987-1996

**A. Autoimmune Diseases**

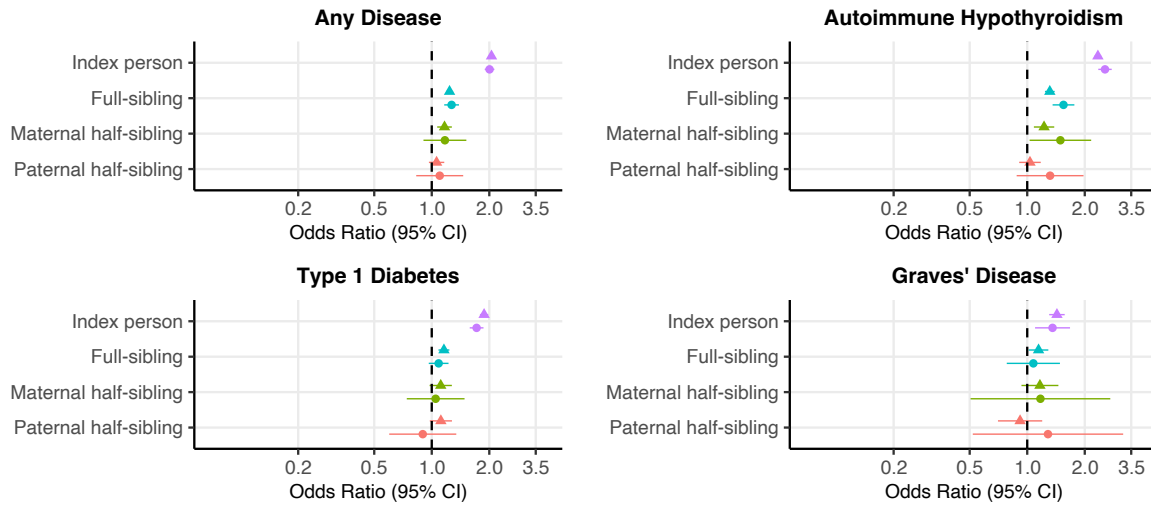

**B. Non-Autoimmune Diseases**

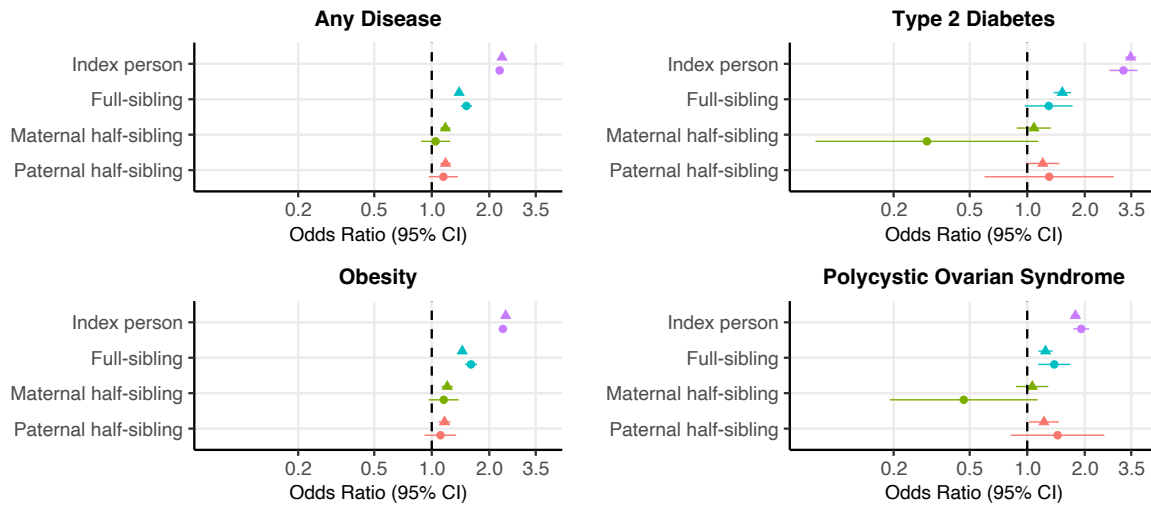

Note: As polycystic ovarian syndrome is a condition affecting women's ovaries, only female individuals were included in the analyses when exploring this disorder.

**Figure S3. Association and familial co-aggregation of depression and endocrine-metabolic disorders, grouped as autoimmune and non-autoimmune conditions: Comparison of male and female**

▲ Male  
● Female

**A. Autoimmune Diseases**

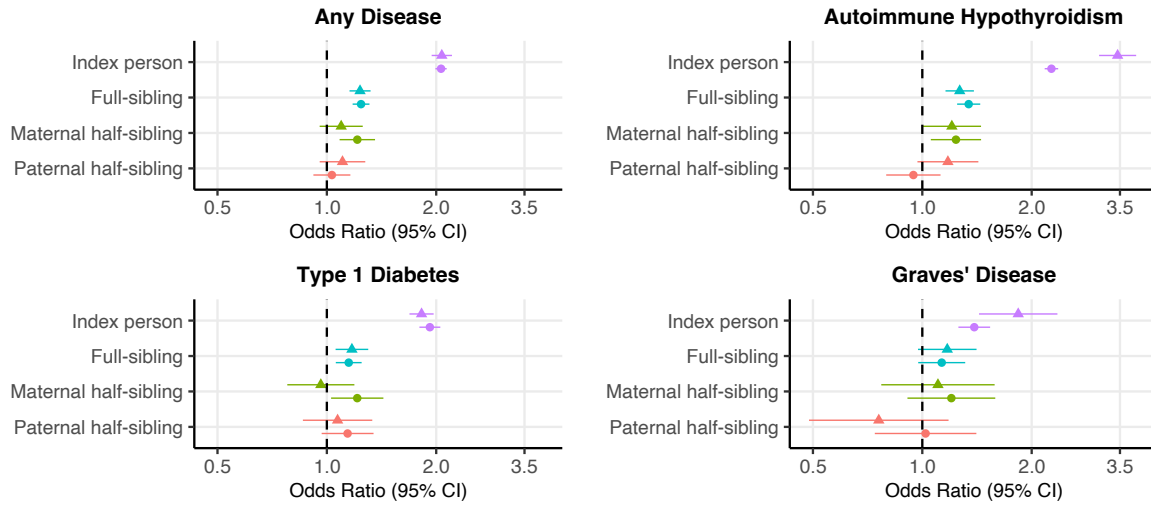

**B. Non-Autoimmune Diseases**

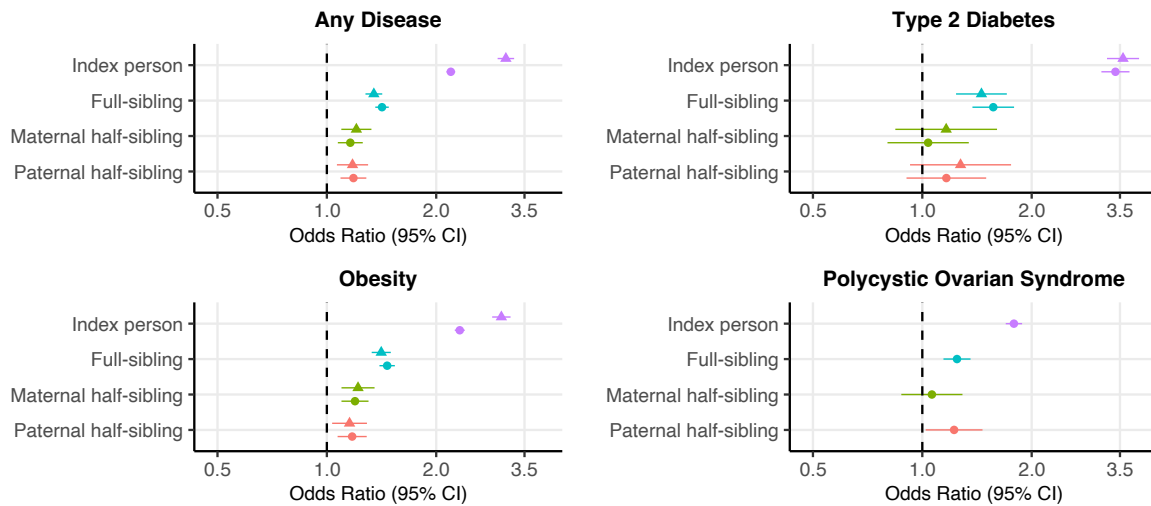

Note: As polycystic ovarian syndrome is a condition affecting women's ovaries, only female individuals were included in the analyses when exploring this disorder.

**Figure S4. Association and familial co-aggregation of depression and endocrine-metabolic disorders, across parental educational levels**

**A. Autoimmune Diseases**

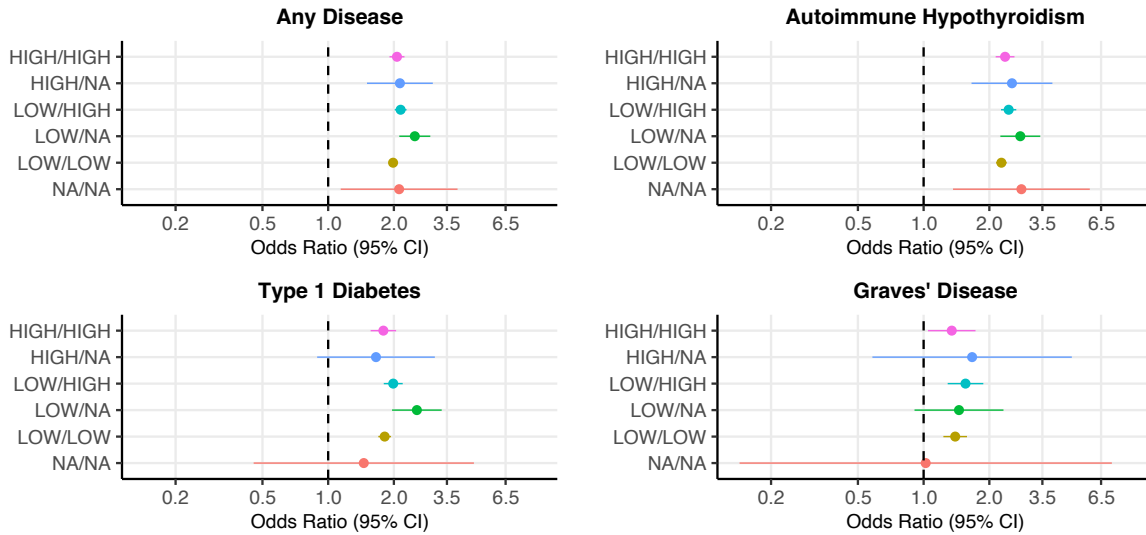

**B. Non-Autoimmune Diseases**

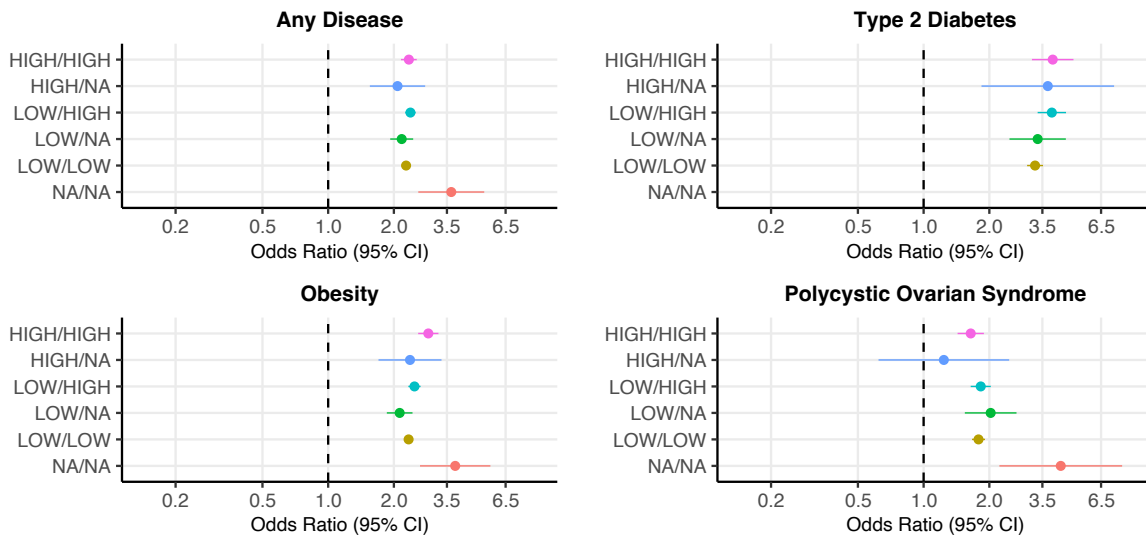

NA: Not applicable

Note: As polycystic ovarian syndrome is a condition affecting women's ovaries, only female individuals were included in the analyses when exploring this disorder.

Both maternal and paternal educational levels were measured, defined as low (primary school, lower and upper secondary school) or high ( $\geq 1$  year of university).

Labels explanation:

- HIGH/HIGH = both parents had high educational level
- HIGH/NA = one parent had high educational level, while the other parent had missing information

- LOW/HIGH = one parent had low educational level, while the other parent high educational level
- LOW/NA = one parent had low educational level, while the other parent had missing information
- LOW/LOW = both parents had low educational level
- NA/NA = both parents had missing information

## References

1. Rijsdijk FV, Sham PC. Analytic approaches to twin data using structural equation models. *Briefings in bioinformatics*. 2002;3(2):119-33.
2. McGuffin P, Owen MJ, Gottesman II. *Psychiatric genetics and genomics*. 2004.
3. Sullivan PF, Eaves LJ. Evaluation of analyses of univariate discrete twin data. *Behavior genetics*. 2002;32(3):221-7.
4. Thvilum M, Brandt F, Brix TH, Hegedüs L. Month of birth is associated with the subsequent diagnosis of autoimmune hypothyroidism. A nationwide Danish register-based study. *Clinical endocrinology*. 2017;87(6):832-7.
5. Zachrisson I, Tibell C, Bang P, Ortqvist E. Prevalence of type 2 diabetes among known patients with diabetes aged 0–18 years in Sweden. *J Pediatr Endocrinol Metab*. 2003;16:O-12.
6. De Franco E, Flanagan SE, Houghton JA, Allen HL, Mackay DJ, Temple IK, et al. The effect of early, comprehensive genomic testing on clinical care in neonatal diabetes: an international cohort study. *The Lancet*. 2015;386(9997):957-63.
